# Supplementary material for: Achieving a direct band gap and high power conversion efficiency in an SbI3/BiI3 type-II vdW heterostructure via interlayer compression and electric field application
Source: Royal Society of Chemistry journal article supplement (doi:10.1039/c8cp07298a), 2019-01-01
Supplement: c8cp07298a1.pdf [file c8cp07298a1.pdf]

Supporting Information:  
Achieving Direct Band Gap and High Power  
Conversion Efficiency in  $\text{SbI}_3/\text{BiI}_3$  Type-II  
vdW Heterostructure via Interlayer  
Compression and Electric Field

Kang Lai,<sup>†</sup> Hongxing Li,<sup>†</sup> Yuan-Kai Xu,<sup>†</sup> Wei-Bing Zhang,<sup>\*,†,‡</sup> and Jiayu Dai<sup>¶</sup>

<sup>†</sup>*School of Physics and Electronic Sciences, Changsha University of Science and  
Technology, Changsha 410114, People's Republic of China*

<sup>‡</sup>*Hunan Provincial Key Laboratory of Flexible Electronic Materials Genome Engineering,  
Changsha University of Science and Technology, Changsha 410114, People's Republic of  
China*

<sup>¶</sup>*Department of Physics, College of Science, National University of Defense Technology,  
Changsha 410073, People's Republic of China*

E-mail: [zhangwb@csust.edu.cn](mailto:zhangwb@csust.edu.cn)

Phone: +86(0)73185258223. Fax: +86(0)73185258217

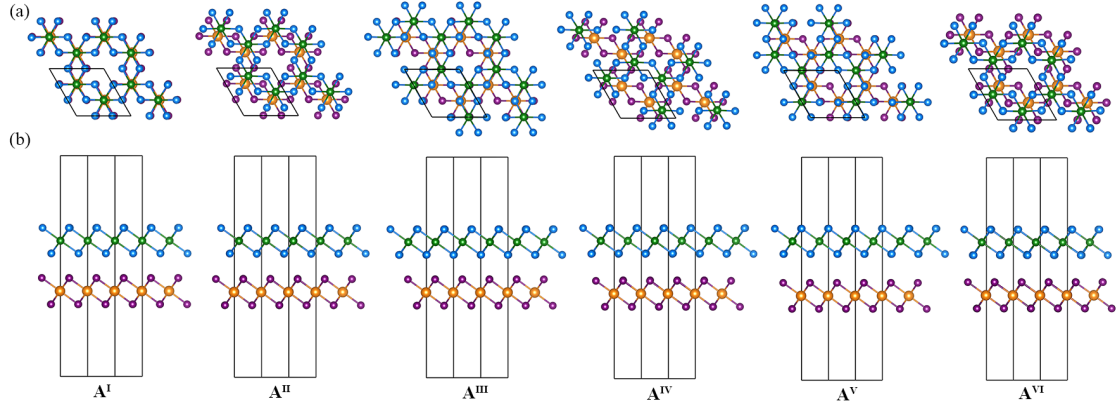

Figure S1: Top (a) and side (b) view of six selected configurations within  $\text{SbI}_3/\text{BiI}_3$  moiré pattern A. The green, yellow, blue and purple balls represent Sb, Bi, and I atoms, respectively.

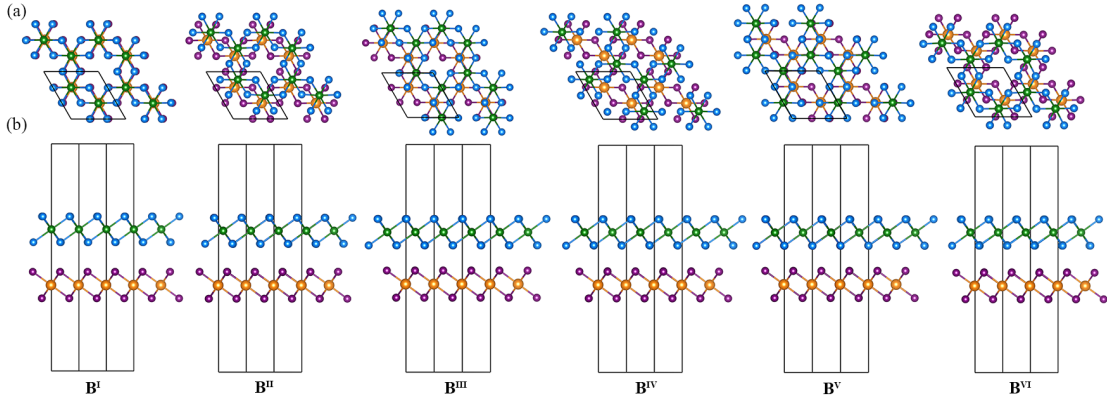

Figure S2: Top (a) and side (b) view of six selected configurations within  $\text{SbI}_3/\text{BiI}_3$  moiré pattern B. The green, yellow, blue and purple balls represent Sb, Bi, and I atoms, respectively.

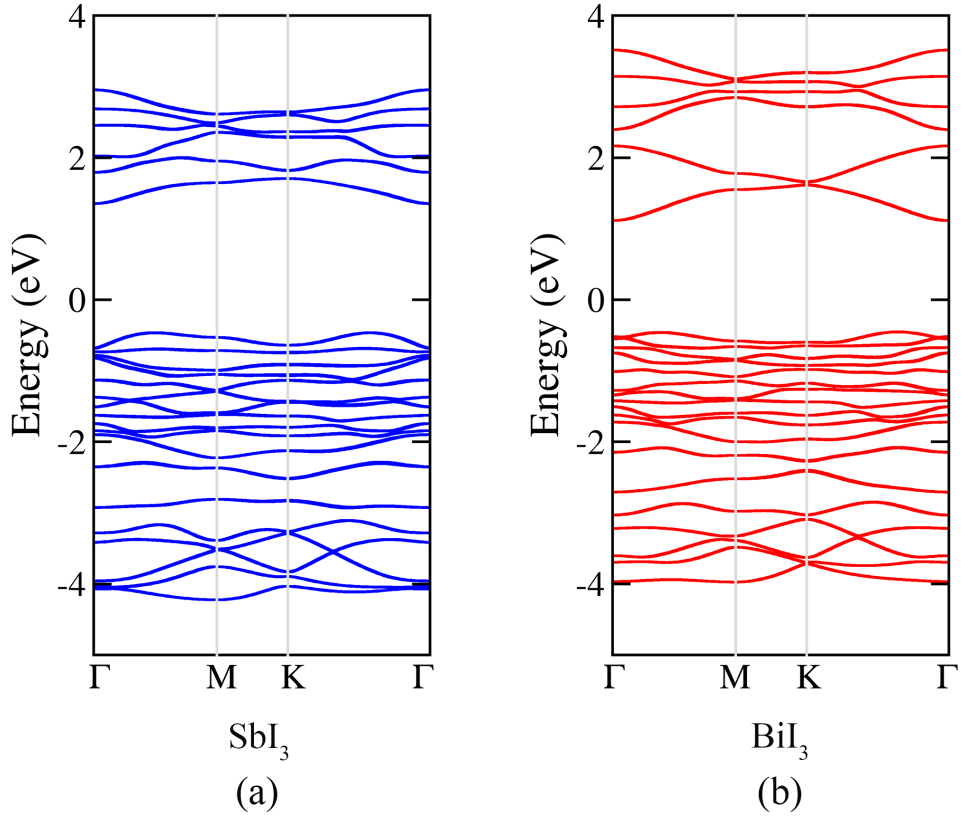

Figure S3: The electronic band structure of free-standing  $\text{BiI}_3$  and stretched  $\text{SbI}_3$  single-layer.

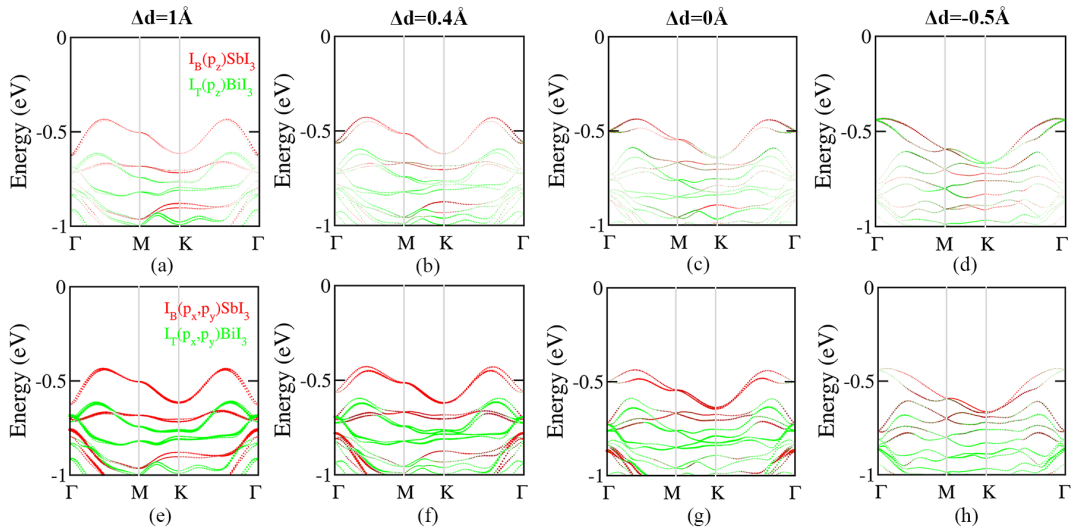

Figure S4: The orbitals-projected band structure of interlayer  $I(p_z)$  states ((a)-(d)) and  $I(p_x, p_y)$  states ((e)-(h)) with different interlayer distances.

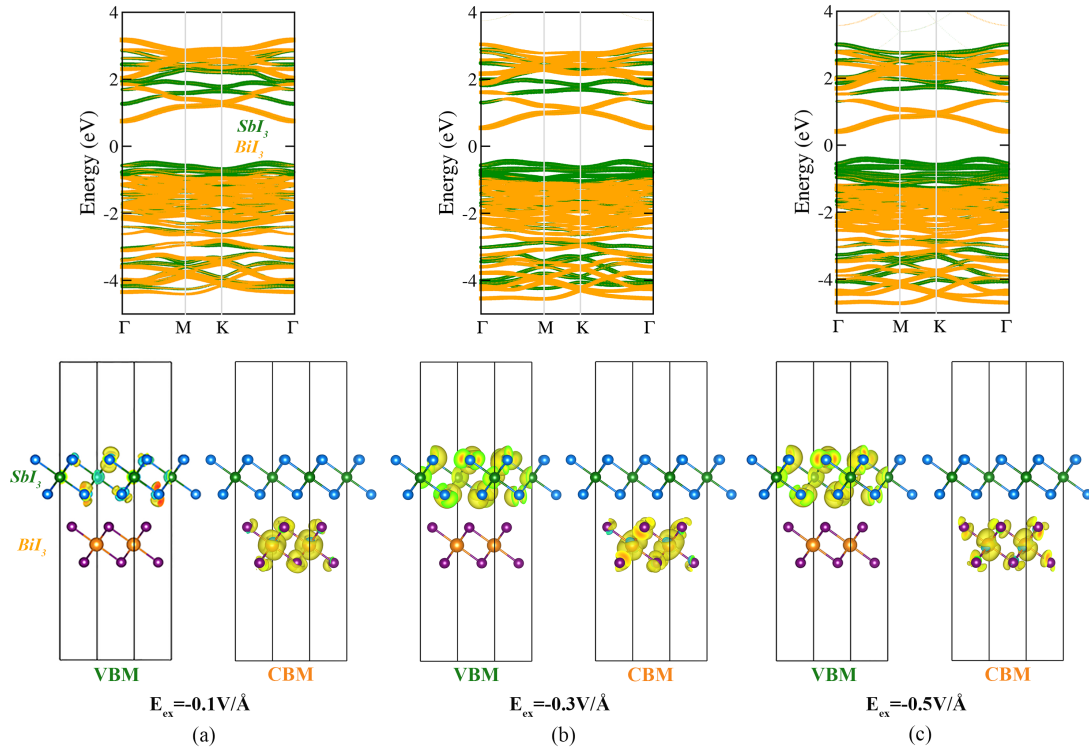

Figure S5: The layer-projected band structure and the isosurface of charge density of the VBM and CBM of  $\text{SbI}_3/\text{BiI}_3$  vdW heterostructure under  $-0.1$ (a),  $-0.3$ (b) and  $-0.5 \text{ V}/\text{\AA}$ (c) electric field. The value of isosurface is  $0.00055 \text{ e}/\text{bohr}^3$ .



Figure S6: The layer-projected band structure and the isosurface of charge density of the VBM and CBM of  $\text{SbI}_3/\text{BiI}_3$  vdW heterostructure under 0.1(a), 0.3(b) and 0.5  $\text{V/\AA}$ (c) electric field. The value of isosurface is 0.00055  $e/\text{bohr}^3$ .
